# Supplementary material
Source: Royal Society of Chemistry journal article supplement (doi:10.1039/d5ma01441g)
Supplement: d5ma01441g1.pdf [file d5ma01441g1.pdf]

## Supporting Information

### Additive Manufacturing of Poly(dicyclopentadiene) and Carbon-Fiber Composites via Heating at a Patterned Photothermal Interface

Chang-Uk Lee<sup>a</sup>; Samuel C. Leguizamon<sup>b,c</sup>; Brad H. Jones<sup>b</sup>; Oleg Davydovich<sup>b</sup>; David Hayne<sup>d</sup>; Meg Tetzloff<sup>a</sup>; Daria Rudykh<sup>a</sup>; Luke Henderson<sup>d</sup>; AJ Boydston<sup>a,e,f\*</sup>

<sup>a</sup>Department of Chemistry, University of Wisconsin, Madison, Wisconsin 53706, USA

<sup>b</sup>Sandia National Laboratories, Albuquerque, New Mexico, 87185, USA

<sup>c</sup>Biodesign Center for Sustainable Macromolecular Materials and Manufacturing (SM3), Arizona State University, Tempe, Arizona, 85281, USA

<sup>d</sup>Institute for Frontier Materials, Deakin University, Geelong, Victoria 3220, Australia

<sup>e</sup>Department of Chemical & Biological Engineering, University of Wisconsin, Madison, Wisconsin 53706, USA

<sup>f</sup>Department of Materials Science & Engineering, University of Wisconsin, Madison, Wisconsin 53706, USA

### Synthesis of poly(tetracyclododecene)-imide-norbornene (pTD-NB)

#### General Information

**Materials and General Considerations.** Dichloromethane, 1,2-dichloroethane, and 1, 2-dichlorobenzene (*o*-DCB) used for MF-ROMP were dried over 3Å molecular sieves for at least 24 h before use. Tetracyclododecene was provided by Promerus as a 95:5 mixture of the endo:endo-exo isomer and used without further purification. 2,4,6-tris(4-methoxyphenyl)pyrylium tetrafluoroborate was synthesized following a literature procedure.<sup>1</sup> Metal-Free ROMP (MF-ROMP) was conducted with a Norman Lamps blue LED lamp (part #: LED-MR16-4W-BLU). Automated flash chromatography was performed using a Biotage Selekt with Biotage Sfär Silica-D – Duo 60 µm prepacked columns using the elution gradient suggested by the software for the reported TLC conditions. All other reagents and solvents were acquired from commercial sources and used without purification unless otherwise noted.

**Characterizations.** <sup>1</sup>H and <sup>13</sup>C NMR spectra were recorded on Bruker Avance III 400 or 500 MHz spectrometers. <sup>1</sup>H NMR shifts are reported in delta (δ) units, expressed in parts per million (ppm) downfield from tetramethylsilane using protio-solvent (residual) as internal standard (CDCl<sub>3</sub>, δ<sub>H</sub> = 7.26 ppm). Multiplicities are reported as follows: s = singlet, d = doublet, t = triplet, dd = doublet of doublets, ddd = doublet of doublet of doublets, m = multiplet, br = broad. <sup>13</sup>C NMR chemical shifts are reported in delta (δ) units, expressed in parts per million (ppm) downfield from tetramethylsilane using protio-solvent (residual) as internal standard (CDCl<sub>3</sub>, δ<sub>C</sub> = 77 ppm). Gel permeation chromatography (GPC) was performed using the following setup: an Agilent Technologies 1260 Infinity II pump with two inline Agilent PLgel (part #: PL1113-6300) columns, Wyatt Technology mini-DAWN light scattering, and Agilent

1260 Infinity II RI detectors, using HPLC grade toluene as the mobile phase, at a flow rate of 1 mL min<sup>-1</sup>. The absolute weight-average molecular weight of polymeric substrates was determined by MALS using their respective dn/dc values. Values of each polymer's dn/dc were determined using Wyatt's ASTRA software assuming 100% mass recovery from the GPC columns.

## Initiator Synthesis

### S2

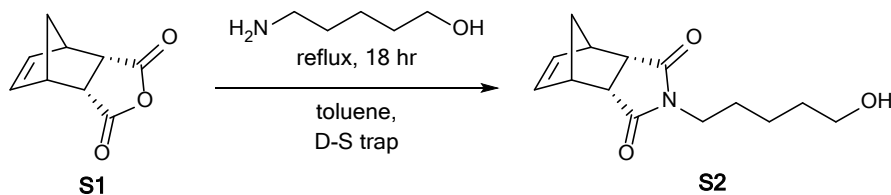

**S2** was prepared according to a previously reported procedure<sup>2</sup>.

<sup>1</sup>H NMR (500 MHz, CDCl<sub>3</sub>)  $\delta$  6.09 (s, 2H), 3.61 (t,  $J$  = 6.5 Hz, 2H), 3.41 – 3.36 (m, 2H), 3.34 (t,  $J$  = 7.3 Hz, 2H), 3.24 (d,  $J$  = 1.8 Hz, 2H), 1.73 (d,  $J$  = 8.8 Hz, 1H), 1.61 – 1.51 (m, 3H), 1.47 (p,  $J$  = 7.4 Hz, 2H), 1.32 (tt,  $J$  = 9.7, 6.0 Hz, 2H). <sup>13</sup>C NMR (126 MHz, CDCl<sub>3</sub>)  $\delta$  177.81, 134.45, 62.63, 52.25, 45.76, 44.92, 38.21, 32.13, 27.53, 23.00. MS-ESI (m/z) [M+H]<sup>+</sup> calculated for C<sub>14</sub>H<sub>19</sub>NO<sub>3</sub> = 250.1438; found 250.1434 (1.6 ppm).

### S3

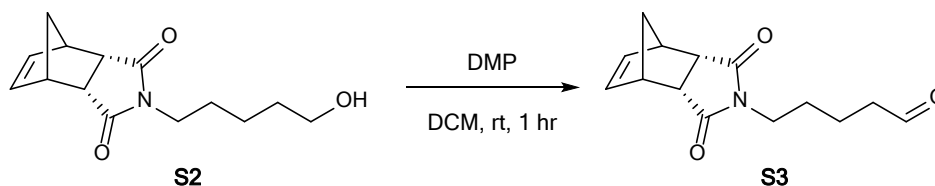

To a flame-dried stirred flask of DMP (12.09g, 28.5 mmol, 1.2 equiv.) in DCM (150 mL) was added **S2** (5.92 g, 28.5 mmol, 1.0 equiv.) in 100 mL DCM. Reaction was stirred for 45 minutes. Reaction was diluted with diethyl ether (100 mL), and 1.3M NaOH (200 mL) was added. Reaction was stirred for 30 minutes. Organic layer was isolated and washed with NaOH, H<sub>2</sub>O, and brine. Reaction mixture was concentrated under reduced pressure. The crude product was used without further purification.

76% yield. <sup>1</sup>H NMR (500 MHz, CDCl<sub>3</sub>)  $\delta$  9.74 (s, 1H), 6.10 (s, 2H), 3.41 – 3.37 (m, 2H), 3.34 (t,  $J$  = 7.0 Hz, 2H), 3.24 (d,  $J$  = 1.4 Hz, 2H), 2.44 (td,  $J$  = 7.2, 1.4 Hz, 2H), 1.76 – 1.70 (m, 1H), 1.61 – 1.43 (m, 5H). <sup>13</sup>C NMR (126 MHz, CDCl<sub>3</sub>)  $\delta$  201.78, 177.73, 134.50, 134.49, 52.30, 45.78, 44.93, 43.17, 37.82, 27.15, 19.21. MS-ESI (m/z) [M+H]<sup>+</sup> calculated for C<sub>14</sub>H<sub>17</sub>NO<sub>3</sub> = 248.1281; found 248.1277 (1.6 ppm).



## S4

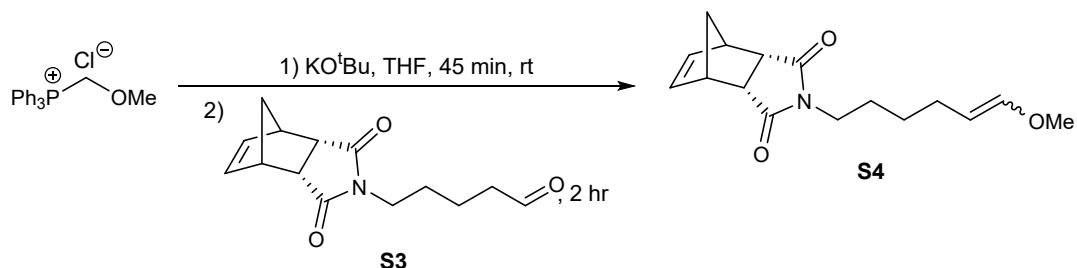

A solution of potassium tert-butoxide (3.62 g, 32.3 mmol, 1.50 equiv.) in 15 mL of dry THF was slowly added to a solution of (methoxymethyl)triphenylphosphonium chloride (11.1 g, 32.3 mmol, 1.50 equiv.) in 40 mL of dry THF. After stirring the red solution at room temperature for 45 min, a solution of **S3** (5.32 g, 21.5 mmol, 1.00 equiv.) in 10 mL of dry THF was slowly added and allowed to stir at room temperature for an additional 2 h. The solvent was removed under vacuum and the yellow oil was diluted with a 1:1 mixture of hexanes and Et<sub>2</sub>O. The organic layer was washed with water (3 x 100 mL) and dried over Na<sub>2</sub>SO<sub>4</sub>. The solvent was removed under reduced pressure and the resulting oil was purified by flash chromatography to yield a clear yellow oil. TLC on silica in 1 : 1 EtOAc : hexanes, product *R<sub>f</sub>*=0.33. The product was visualized as a yellow spot on a pink background after staining with KMnO<sub>4</sub>. 34% yield.

**<sup>1</sup>H NMR** (500 MHz, CDCl<sub>3</sub>) δ 6.26 (d, *J* = 12.5 Hz, 0.65 H, *trans*), 6.09 (t, *J* = 1.9 Hz, 2H), 5.86 (dt, *J* = 6.2, 1.5 Hz, 0.35 H, *cis*), 4.67 (dt, *J* = 12.7, 7.3 Hz, 0.65 H, *trans*), 4.28 (td, *J* = 7.4, 6.2 Hz, 0.35 H, *cis*), 3.56 (s, 1.05 H, *cis*), 3.49 (s, 1.95 H, *trans*), 3.38 (dp, *J* = 3.6, 1.8 Hz, 2H), 3.32 (td, *J* = 7.3, 1.5 Hz, 2H), 3.23 (ddd, *J* = 4.3, 3.0, 1.5 Hz, 2H), 2.03 (qd, *J* = 7.4, 1.4 Hz, 0.70 H, *cis*), 1.90 (qd, *J* = 7.3, 1.2 Hz, 1.30 H, *trans*), 1.72 (ddt, *J* = 8.8, 3.4, 1.7 Hz, 1H), 1.55 – 1.49 (m, 1H), 1.44 (dddd, *J* = 10.5, 8.8, 6.7, 5.0 Hz, 2H), 1.34 – 1.21 (m, 2H). **<sup>13</sup>C NMR** (126 MHz, CDCl<sub>3</sub>) δ 177.75, 147.37, 146.45, 134.44, 106.12, 102.38, 59.46, 55.92, 52.24, 45.75, 44.92, 38.24, 27.97, 27.17, 23.33. **MS-ESI** (*m/z*) [*M*+*H*]<sup>+</sup> calculated for C<sub>16</sub>H<sub>21</sub>NO<sub>3</sub> = 276.1594; found 276.1590 (1.4 ppm).

## Macromonomer Synthesis

### *Synthesis of MMs by MF-ROMP*

**S4** (1 equiv.) and 2,4,6-tris(4-methoxyphenyl)pyrylium tetrafluoroborate (0.5 equiv.) were weighed into a 2-dram vial with PTFE-lined screw cap and containing a magnetic stir bar. Then TD monomer (12.5-100 equiv., 2.5 mmol) was added gravimetrically. 2.5 mL each of dry DCM and dry *o*-DCB were added to the vial for a resulting monomer concentration of 0.5 M, followed by 1 to 2 drops of 1,2-dichloroethane (DCE). An aliquot was taken, diluted with CDCl<sub>3</sub>, and analyzed by <sup>1</sup>H NMR spectroscopy to determine the initial DCE to initiator ratio. The solution was irradiated with blue LED light for 1 hour with stirring. After 1 hour the light was turned off and an aliquot of the solution was taken, diluted with CDCl<sub>3</sub> and analyzed by <sup>1</sup>H NMR spectroscopy to determine the final DCE to initiator ratio, as well as monomer conversion. A

second aliquot was taken, diluted with THF or toluene, and analyzed by GPC. The remaining crude polymer solution was precipitated in rapidly stirred cold (-78 °C) MeOH, resulting in the formation of solids. The solids were isolated by vacuum filtration, then redissolved in THF and precipitated again to remove any residual monomer. The resulting solids were dried overnight under high vacuum.

## S2

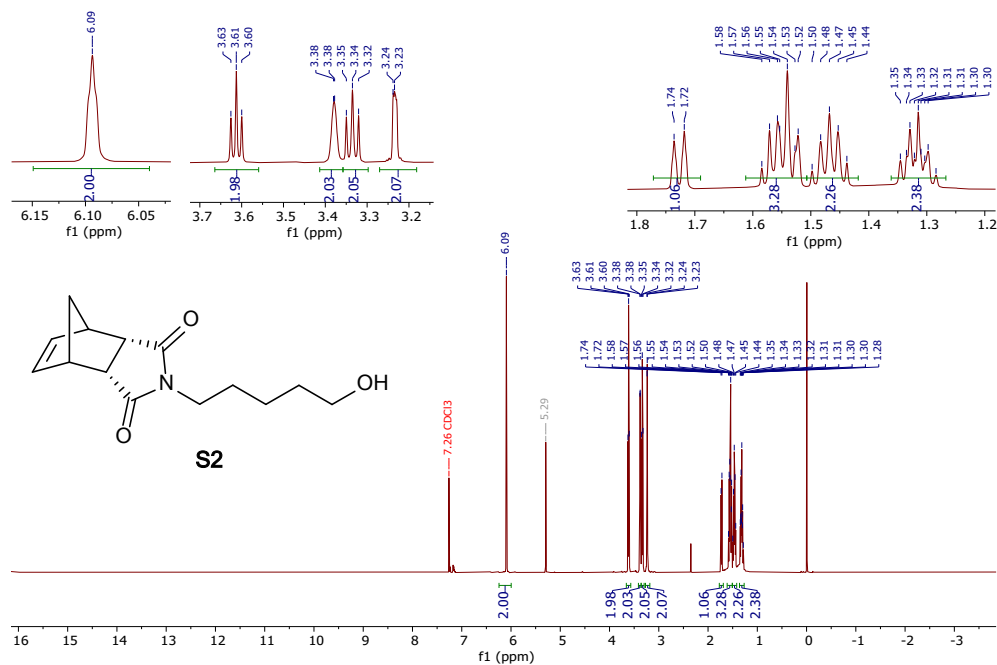

Fig. S1 500 MHz <sup>1</sup>H NMR spectrum of S2 in CDCl<sub>3</sub>.

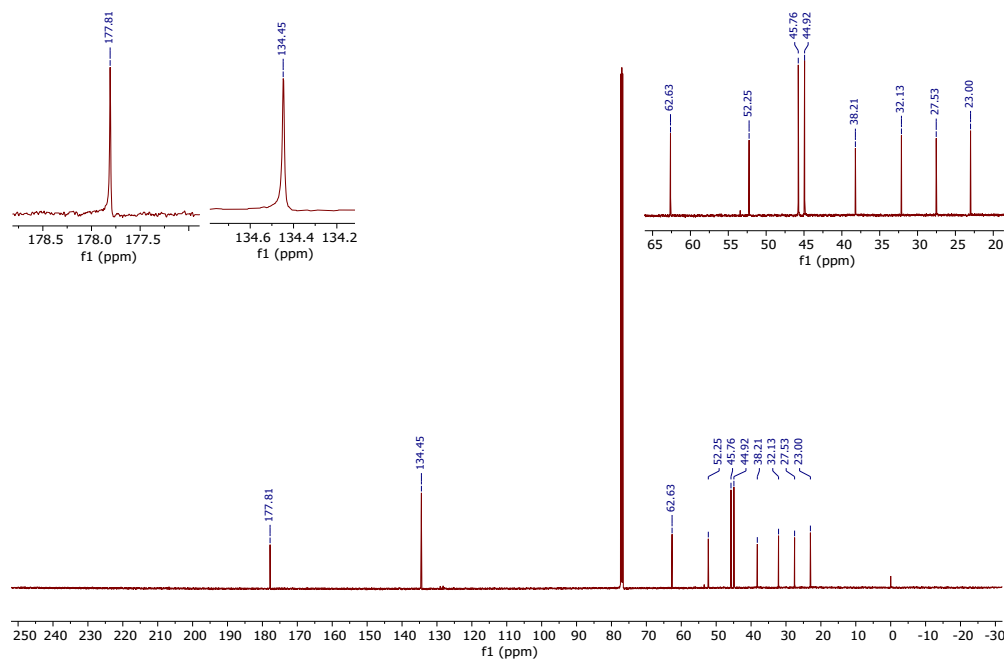

**Fig. S2** 126 MHz <sup>13</sup>C{<sup>1</sup>H} NMR spectrum of S2 in CDCl<sub>3</sub>.

**S3**

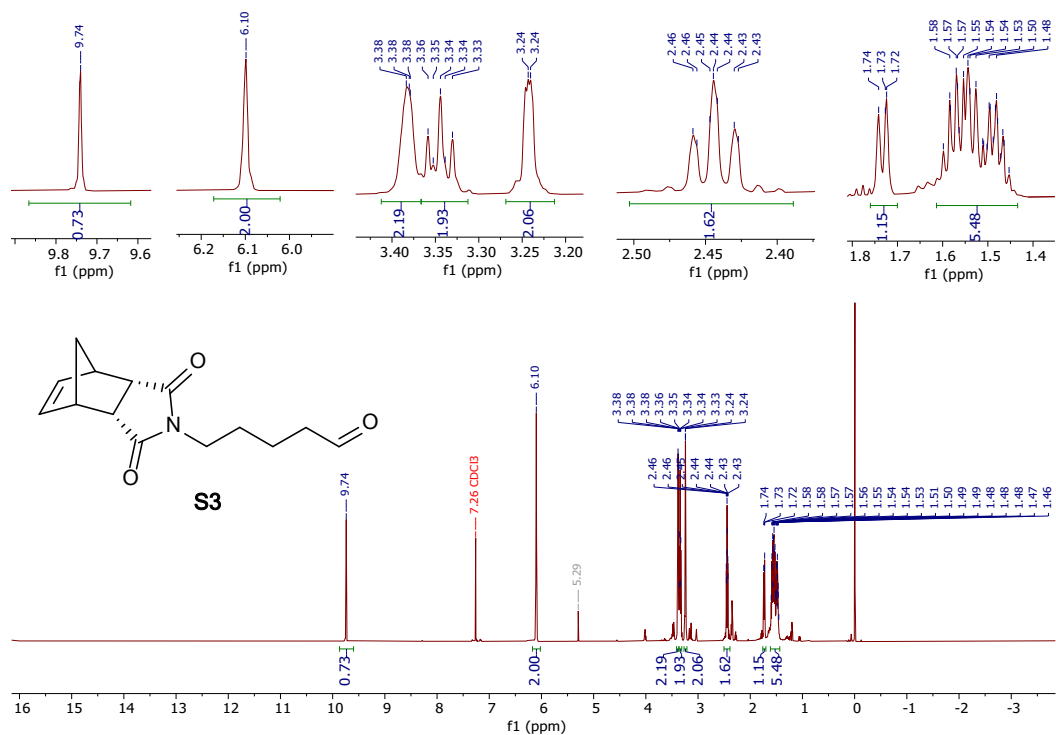

**Fig. S3** 500 MHz <sup>1</sup>H NMR spectrum of S3 in CDCl<sub>3</sub>.

S6

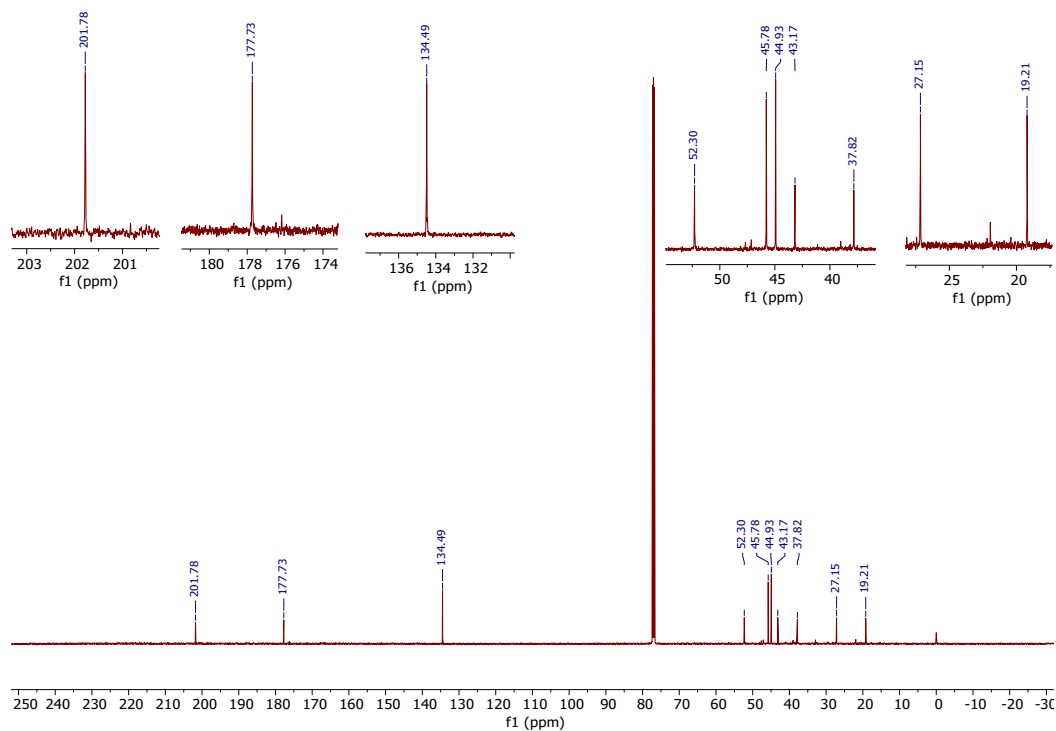

**Fig. S4** 126 MHz  $^{13}\text{C}\{^1\text{H}\}$  NMR spectrum of **S3** in  $\text{CDCl}_3$ .

**S4**

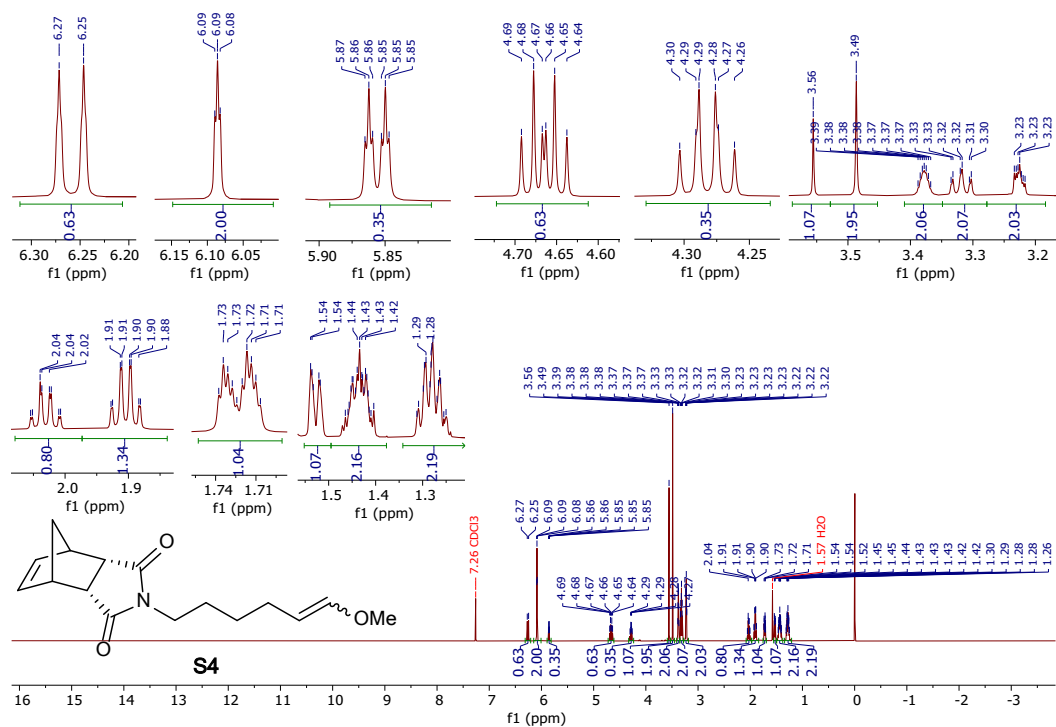

**Fig. S5** 500 MHz  $^1\text{H}$  NMR spectrum of **S4** in  $\text{CDCl}_3$ .

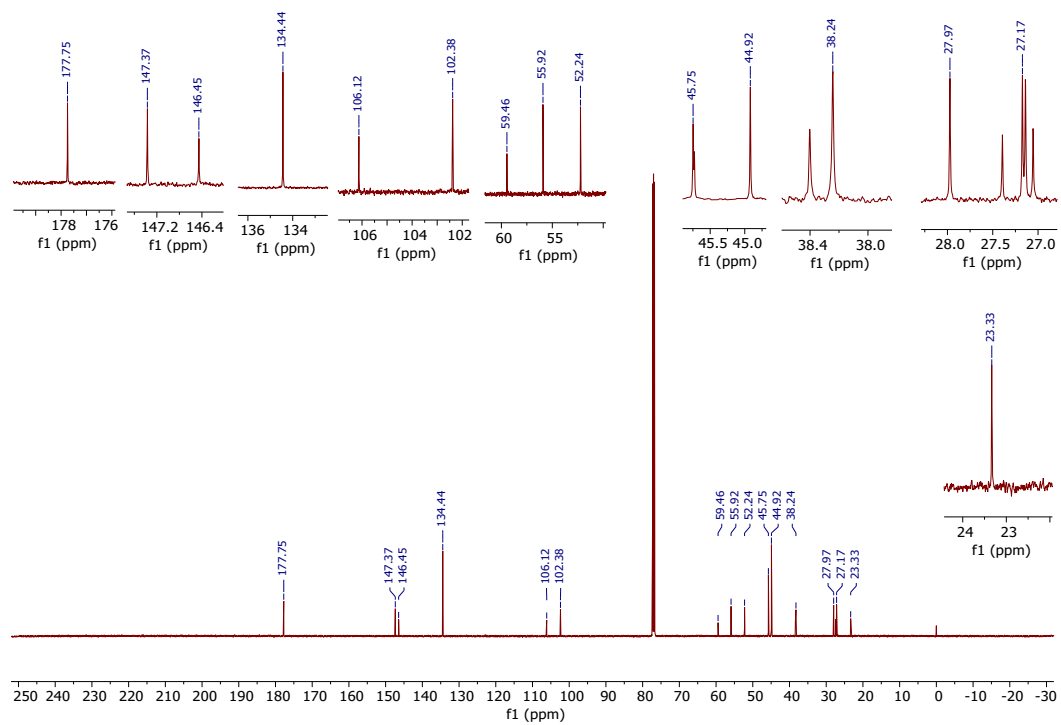

**Fig. S6** 126 MHz  $^{13}\text{C}\{^1\text{H}\}$  NMR spectrum of **S4** in  $\text{CDCl}_3$ .

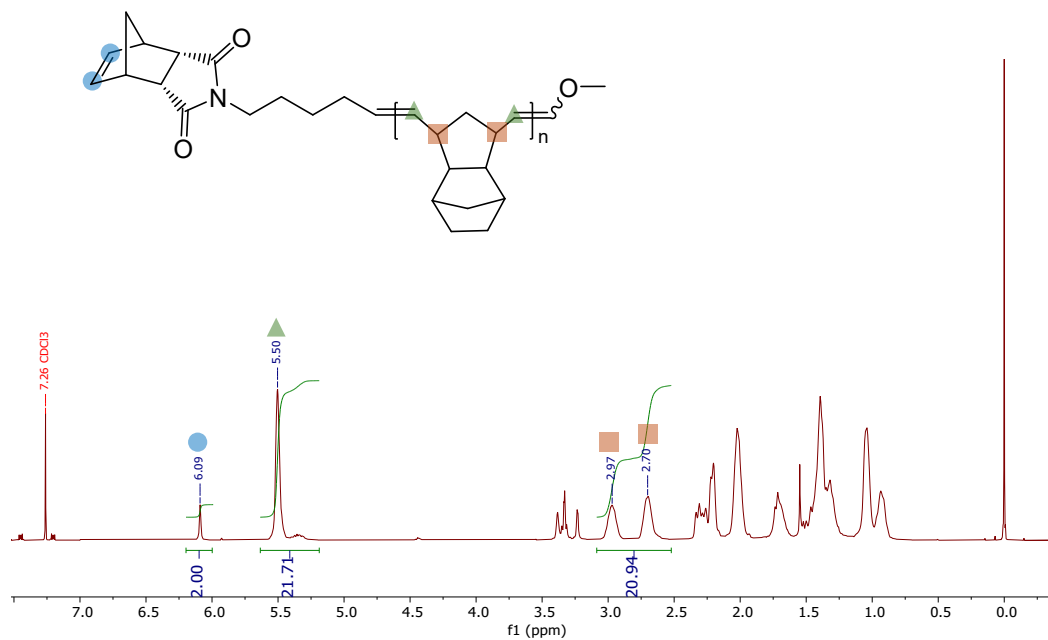

**Fig. S7** 500 MHz  $^1\text{H}$  NMR spectrum of **TD<sub>2.5k</sub>-NBI-endo** in  $\text{CDCl}_3$ .

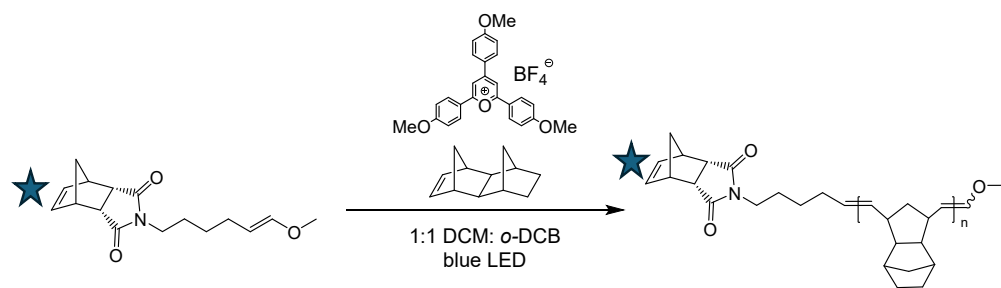

| [TD] : [I] :<br>[PC] | t (min) | conv. | $M_n$<br>(kDa) | $\bar{D}$ | $f$ |
|----------------------|---------|-------|----------------|-----------|-----|
| 50 : 1 : 0.05        | 60      | 76%   | 13.1           | 1.32      | 46% |

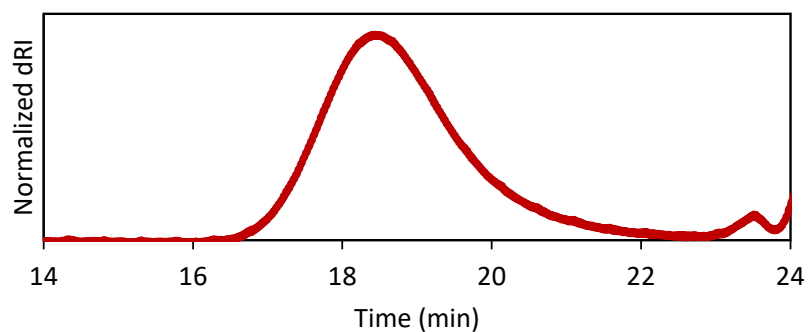

**Fig. S8** Crude GPC (toluene) dRI trace of MF-ROMP of **S4** after 60 minutes of irradiation.

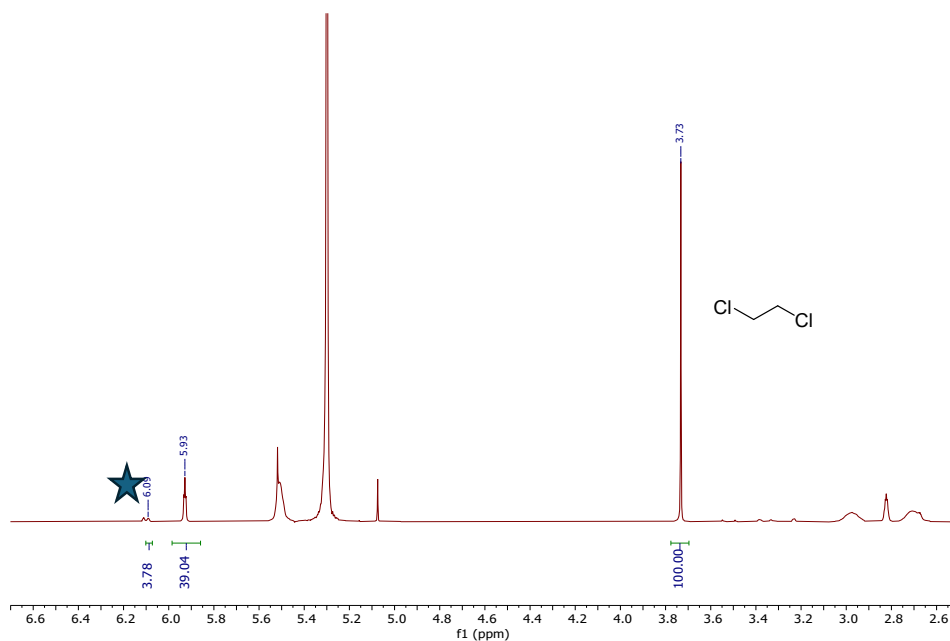

**Fig. S9** 400 MHz  $^1\text{H}$  NMR of MF-ROMP with *endo*-norbornene imide enol ether initiator before (top) and after (bottom) 60 minutes of irradiation. Integration of norbornene-imide alkene at 6.09 ppm (indicated by star) relative to the integration of a DCE internal standard at 3.73 ppm does not change over the course of the reaction.

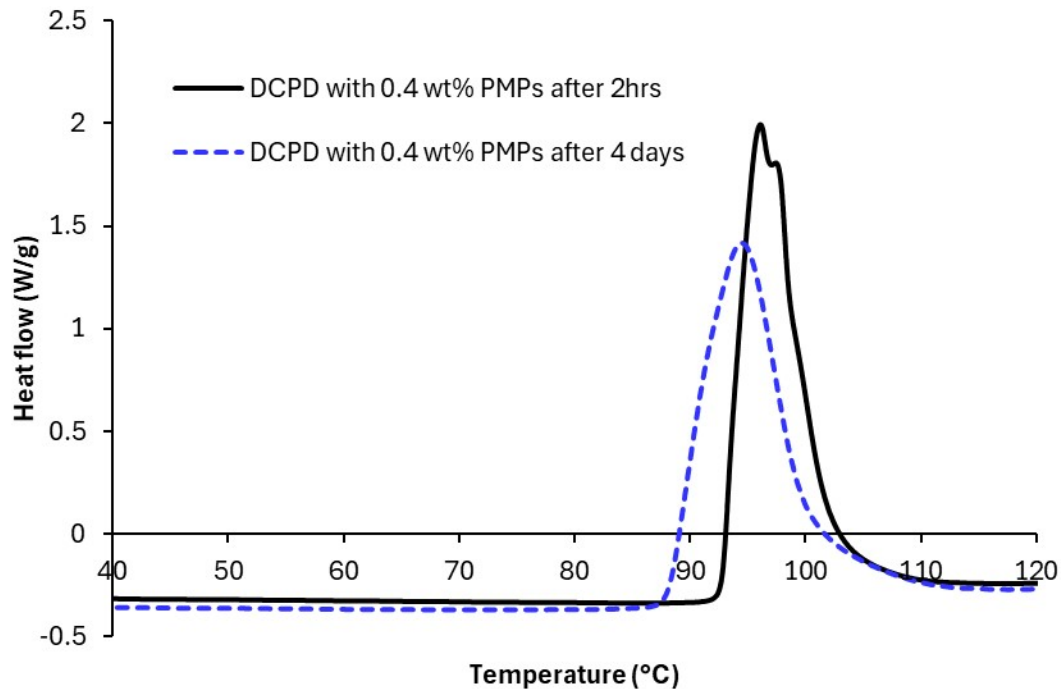

**Fig. S10** DSC thermograms of DCPD with 0.4 wt% PSU-PMPs after stirring for 2 hrs (solid black line) and DCPD with 0.4 wt% PSU-PMPs after stirring for 4 days (blue dashed line).

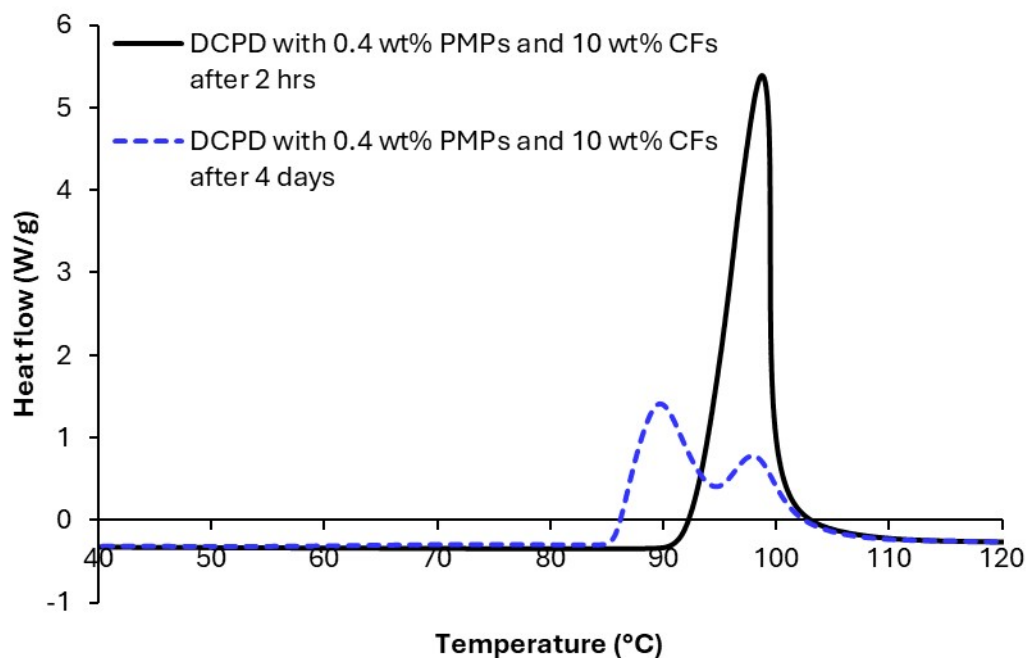

**Fig. S11** DSC thermograms of DCPD with 0.4 wt% PSU-PMPs and 10 wt% CFs after stirring for 2 hrs (solid black line) and DCPD with 0.4 wt% PSU-PMPs and 10 wt% CFs after stirring for 4 days (blue dashed line).

**Table S1** DSC results of DCPD or DCPD with 10% CFs after stirring 2 hrs or 4 days.

|                           | Onset (°C) | Peak (°C) | Enthalpy (J/g) |
|---------------------------|------------|-----------|----------------|
| DCPD after 2 hrs          | 93         | 96        | 76             |
| DCPD after 4 days         | 87         | 95        | 90             |
| DCPD + 10%CF after 2 hrs  | 98         | 91        | 136            |
| DCPD _ 10%CF after 4 days | 85         | 90, 97    | 99             |

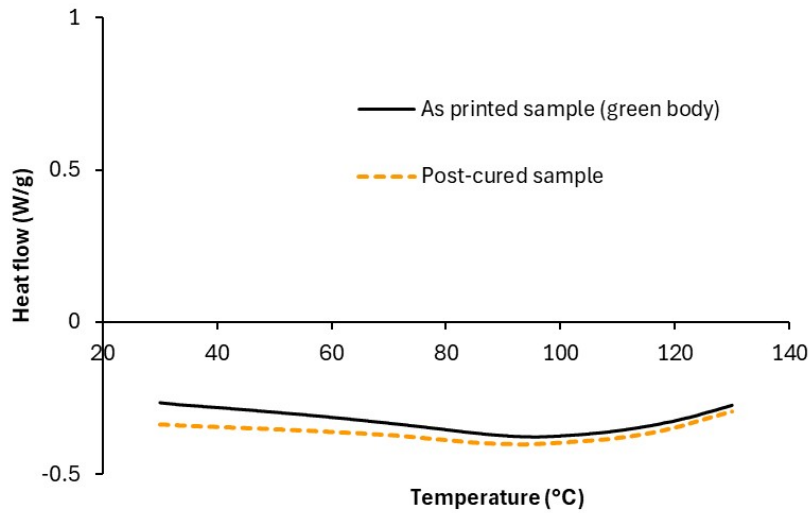

**Fig. S12** DSC thermograms of a printed dogbone (solid black) and a dogbone after post-curing at 150 C for 3 hrs (orange dashed line).

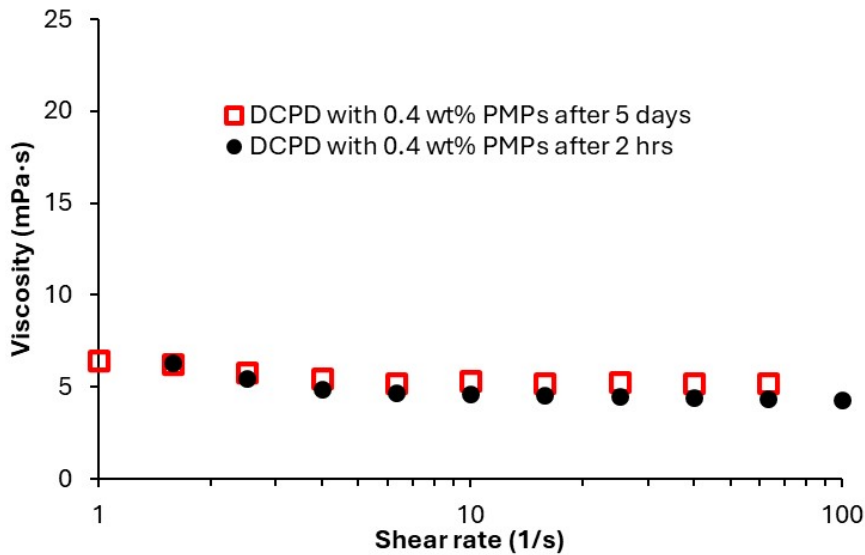

**Fig S13.** Apparent viscosity of DCPD with 0.4 wt% PMPs after stirring for 2 hrs or 5 day.

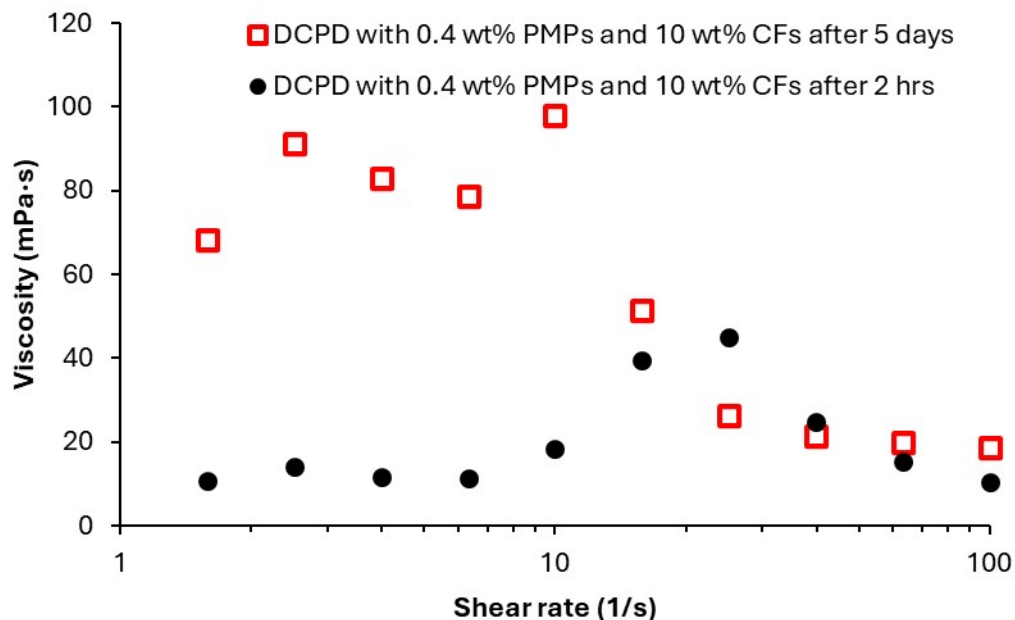

**Fig S14.** Apparent viscosity of DCPD with 0.4 wt% PMPs and 10 wt% CFs after stirring for 2 hrs or 5 day.

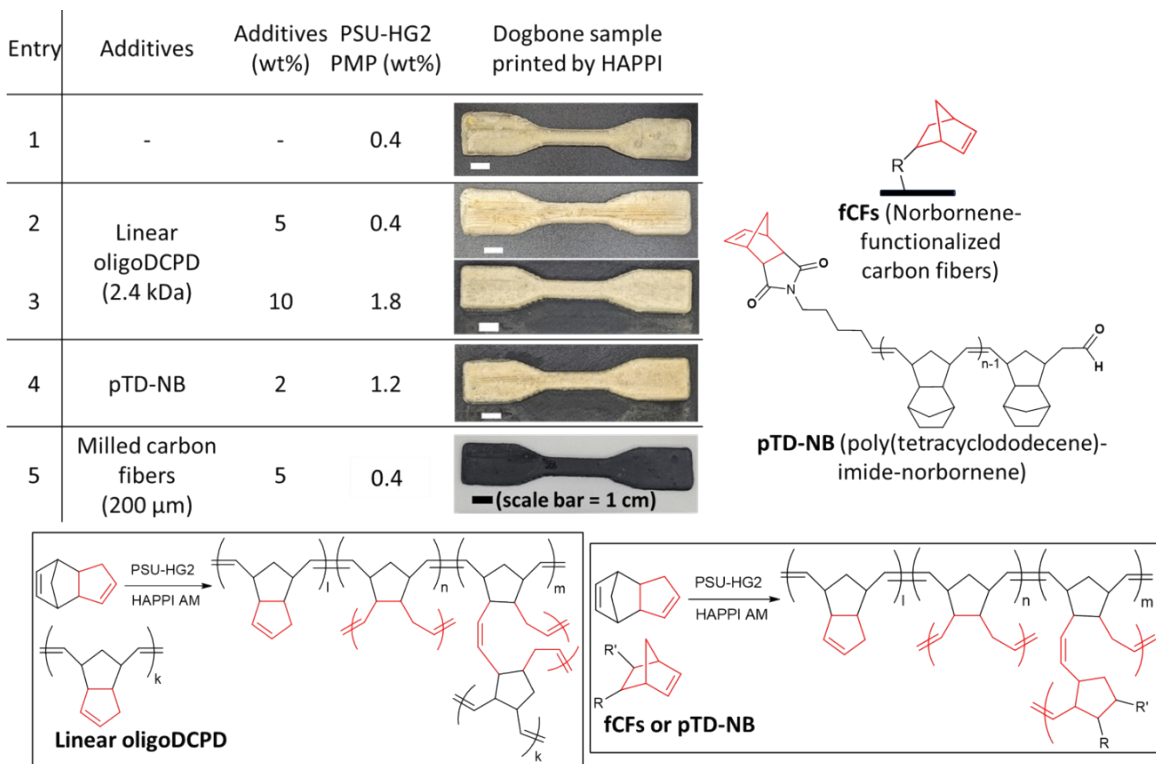

**Fig. S15** Dogbone samples of pDCPD or pDCPD with various additives, linear oligoDCPD, pTD-NB or milled CF produced by HAPPI AM and reaction scheme for metathesis reaction of

DCPD with the additives. Note: Dogbone samples were width of 7.5 mm, thickness of 3 mm, and length of 3 to 4 mm.

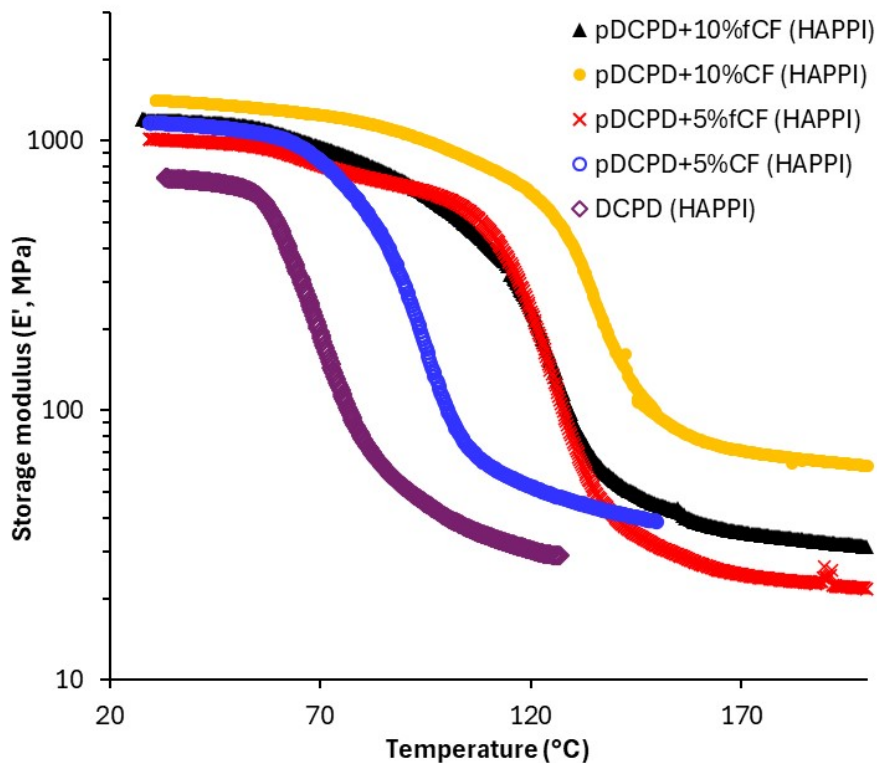

**Fig. S16** Storage modulus ( $E'$ , MPa) of pDCPD, pDCPD-5%CF, pDCPD-5%fCF, pDCPD-10%CF, and pDCPD-10%fCF rectangles prepared by HAPPI AM.

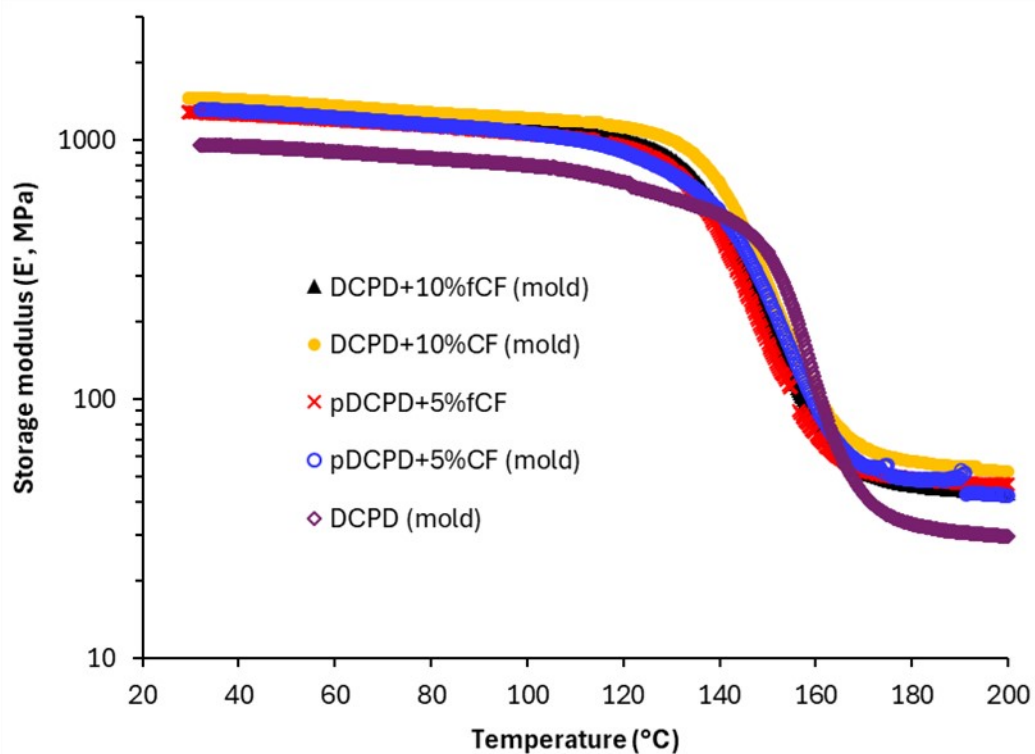

**Fig. S17** Storage modulus ( $E'$ , MPa) of pDCPD, pDCPD-5%CF, pDCPD-5%fCF, pDCPD-10%CF, and pDCPD-10%fCF rectangles prepared by molding.

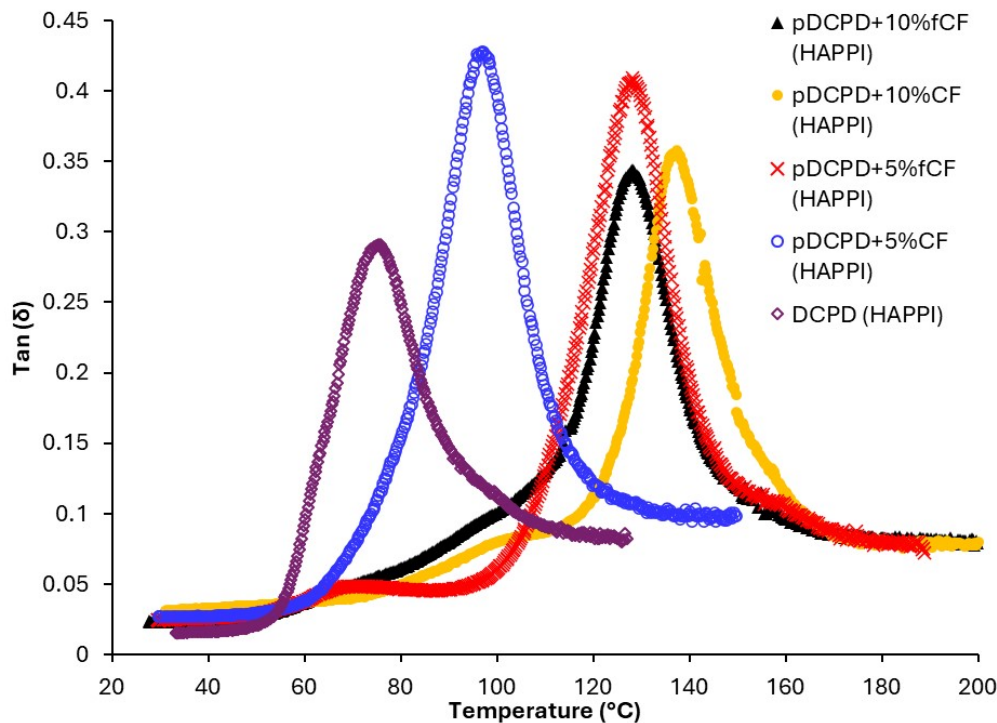

**Fig. S18**  $\tan(\delta)$  of pDCPD, pDCPD-5%CF, pDCPD-5%fCF, pDCPD-10%CF, and pDCPD-10%fCF rectangles prepared by HAPPI AM.

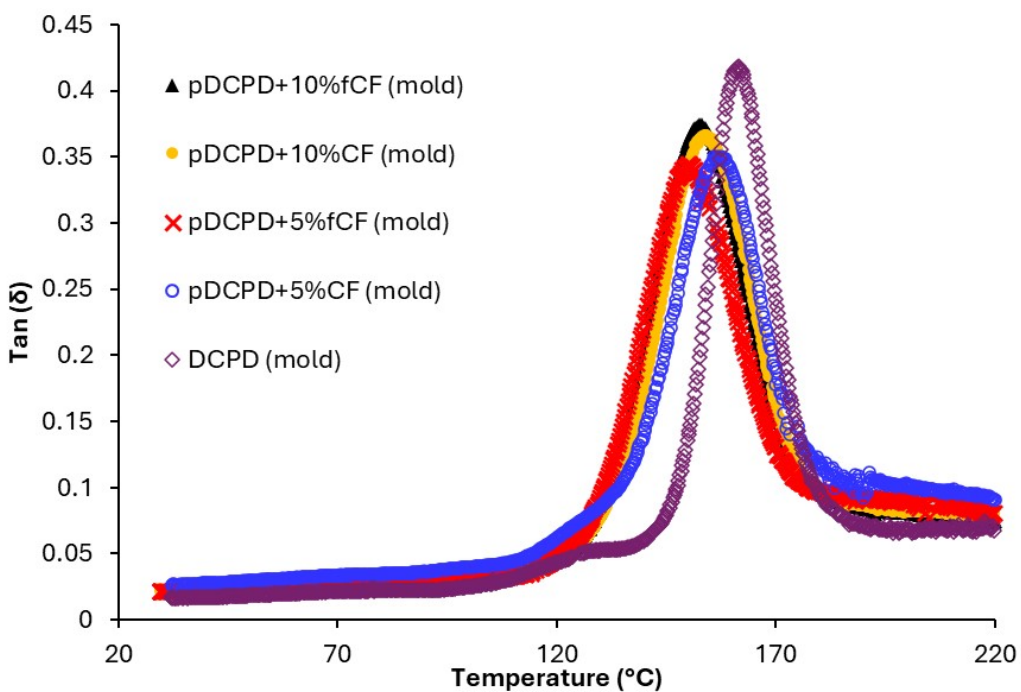

**Fig. S19**  $\tan(\delta)$  of pDCPD, pDCPD-5%CF, pDCPD-5%fCF, pDCPD-10%CF, and pDCPD-10%fCF rectangles prepared by HAPPI AM.

**Table S2** Comparison between samples of pDCPD, pDCPD+5% CF, pDCPD+5%fCF, pDCPD+10%CF, and pDCPD+10% fCF prepared by HAPPI versus molding from DMA results shown in Figs. S16 through S19.

| Formulation  | Storage modulus (E', MPa) at 33 °C |        | T <sub>g</sub> from tan(δ) peak (°C) |        |
|--------------|------------------------------------|--------|--------------------------------------|--------|
|              | HAPPI                              | Molded | HAPPI                                | Molded |
| DCPD         | 690                                | 962    | 89                                   | 161    |
| pDCPD+5%CF   | 1160                               | 1316   | 97                                   | 157    |
| pDCPD+5%fCF  | 1009                               | 1281   | 128                                  | 150    |
| pDCPD+10%CF  | 1414                               | 1458   | 137                                  | 154    |
| pDCPD+10%fCF | 1198                               | 1346   | 128                                  | 153    |

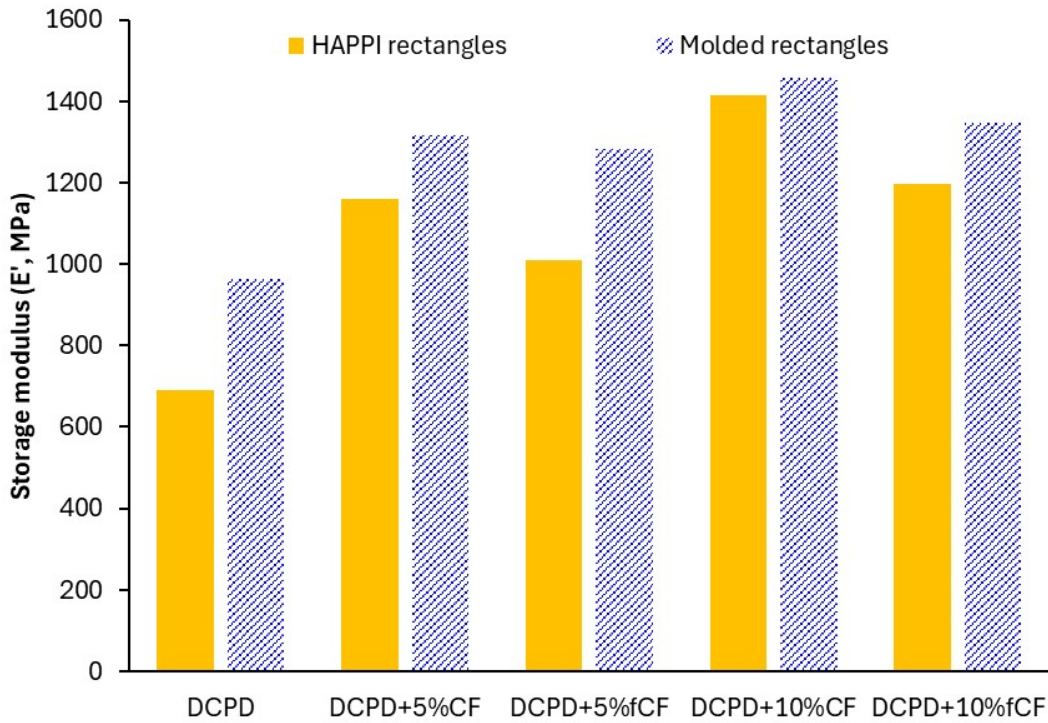

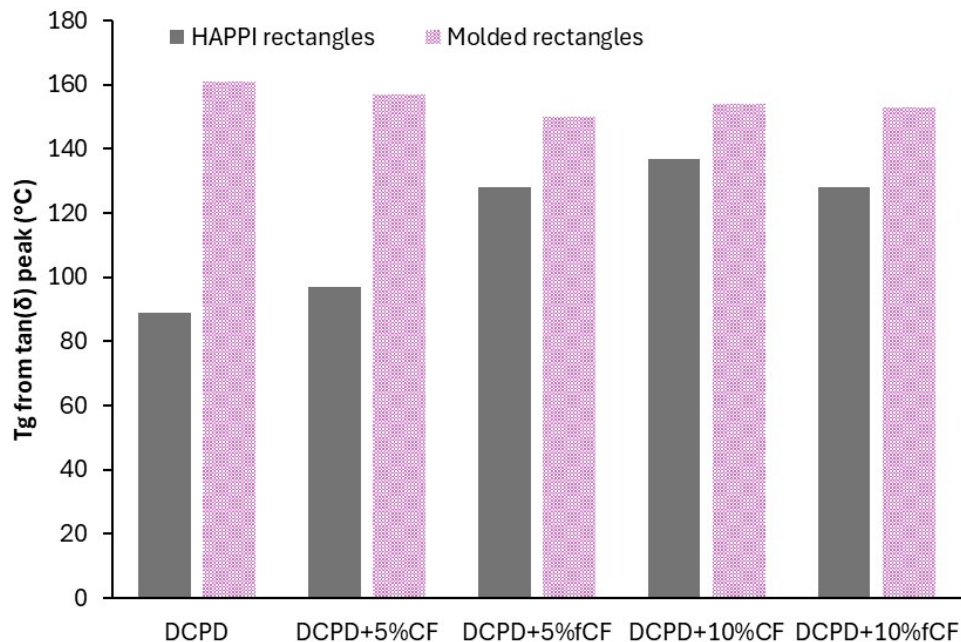

**Fig. S20** Comparison of storage modulus ( $E'$ ) at 33 °C and  $T_g$  from  $\tan(\delta)$  peak samples prepared by HAPPI AM to those by molding shown in Table S2.

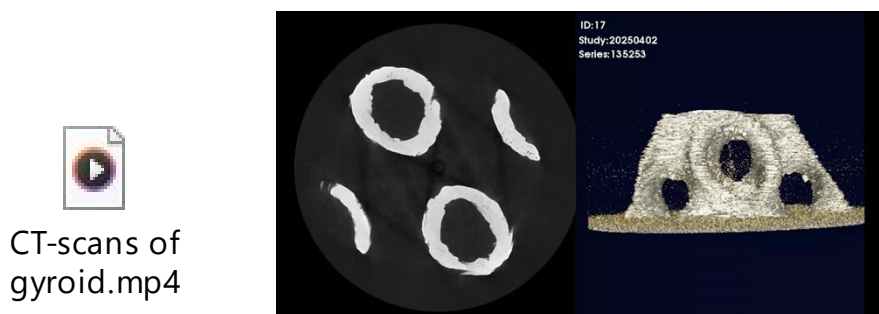

**Fig. S21** Video showing CT-scans of gyroid (presented in Fig. 3) and a still image of it.

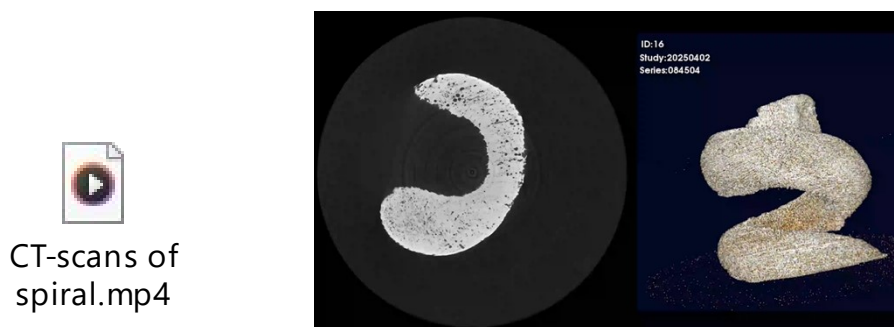

**Fig. S22** Video showing CT-scans of spiral (presented in Fig. 3) and a still image of it.

## References

- 1 K. A. Ogawa, A. E. Goetz and A. J. Boydston, *J. Am. Chem. Soc.*, 2015, **137**, 1400–1403.
